# Supplementary material for: Pinning effect of reactive elements on adhesion energy and adhesive strength of incoherent Al2O3/NiAl interface
Source: Royal Society of Chemistry journal article supplement (doi:10.1039/c6cp03609k), 2016-01-01
Supplement: c6cp03609k1.pdf [file c6cp03609k1.pdf]

# Supplemental Materials

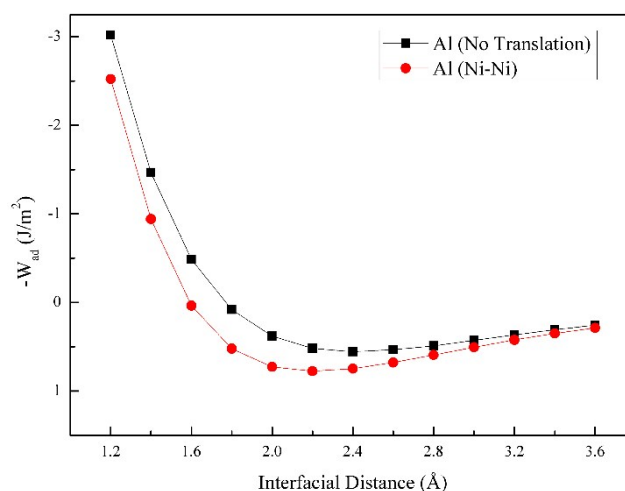

**Fig. S1** (Color online): The interface adhesion curves for the Al-terminated interface as calculated within the PBE.

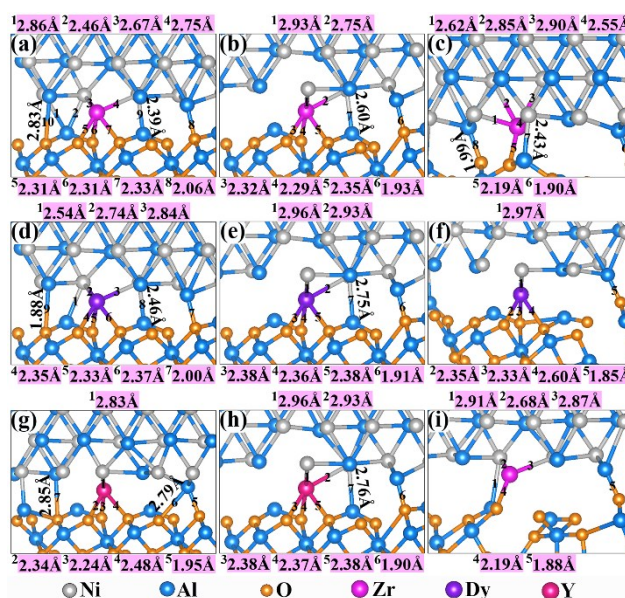

**FIG. S2** (Color online): The variation of bond lengths at the interface viewed along crystallographic  $[0001]_{\text{alumina}}$  direction, i.e. z axis in Cartesian coordinate system at equilibrium, at tensile strains corresponding to the maximum stress, and after instability respectively for the  $\text{Al}_2\text{O}_3/\text{NiAl}$  interface of Zr-doping (a-c), Dy-doping (d-f), Y-doping (g-i).

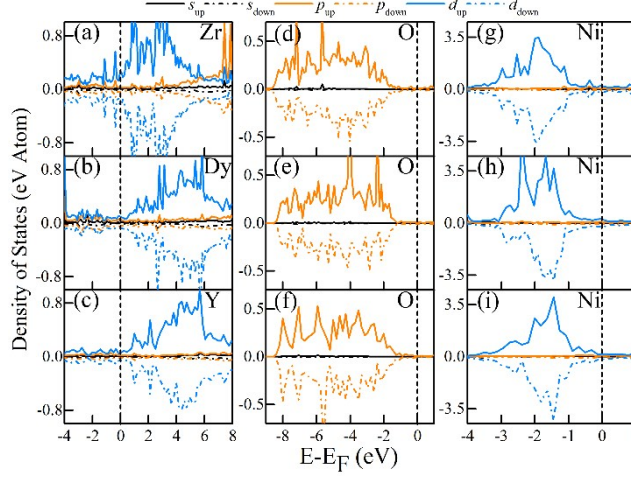

**FIG. S3** (Color online): The valence charge density differences (VCDD) and Bader charges analysis for single RE doped  $\text{Al}_2\text{O}_3/\text{NiAl}$  interface of (a) Zr atom, (d) O atom and (g) Ni atom in Zr-doping; (b) Dy atom, (e) O atom and (h) Ni atom in Dy-doping; (c) Y atom, (f) O atom and (i) Ni atom in Y-doping.
